# Supplementary material
Source: ML conference proceedings conference paper supplement (https://proceedings.mlr.press/v139/van-gorp21a.html)
Supplement: Supplementary file [file van-gorp21a-supp.pdf]

## A Computational complexity

One of the drawbacks of A-DPS compared to learned fixed sampling schemes is its higher amount of computational complexity. The main source of this complexity is the unrolling of iterations, leading to a computational complexity of  $O(I) = O(M/\rho)$ . Although we set  $\rho$  equal to 1 in all our experiments, one can in fact seamlessly interpolate between A-DPS and DPS by choosing  $1 \leq \rho \leq M$ . This constitutes a trade-off between computational complexity and adaptation rate. We leave further exploration of this trade-off to future work.

We can also express computational complexity in terms of run-time on a machine, in our case a GeForce GTX 1080 Ti. A comparison of DPS and A-DPS in terms of training time per epoch can be seen in Fig. 8. We can see that the training time for A-DPS increases for higher sampling ratios where it needs to unroll through more iterations. By combining the results from Fig. 2 (in the main body of the paper) and Fig. 8, one can make a trade-off between run-time and accuracy. Where A-DPS achieves higher accuracy for stricter sampling regimes, while at the same time not increasing run-time by a lot.

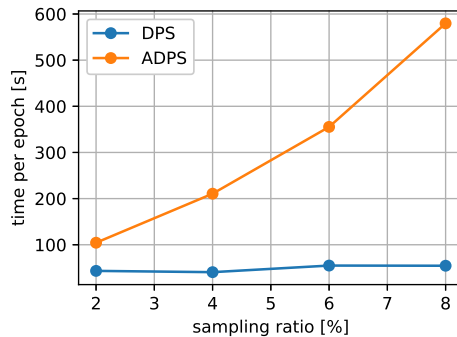

Figure 8: Comparison between DPS and A-DPS of time taken to train for one epoch for the MNIST example on a GeForce GTX 1080 Ti.

For the MRI experiment with image size  $208 \times 208$ , the training times per epoch are 8 and 150 minutes, for DPS and A-DPS, respectively. Inference is however fast: A-DPS only requires  $\sim 13$  ms of processing time to determine the next-to-acquire K-space line and reconstruct an image after each step. This is well below the shortest reported Time of Echo (TE) for this MRI acquisition, being 27 ms.

## B MRI reconstruction examples

| Method                | Sampling Mask                                                                       | Reconstruction                                                                       | Error Map                                                                                                                                         |
|-----------------------|-------------------------------------------------------------------------------------|--------------------------------------------------------------------------------------|---------------------------------------------------------------------------------------------------------------------------------------------------|
| Ground Truth          |                                                                                     |    |                                                                                                                                                   |
| Random Uniform        |    |    |  0.030<br>0.025<br>0.020<br>0.015<br>0.010<br>0.005<br>0.000   |
| Low Pass              |    |    |  0.030<br>0.025<br>0.020<br>0.015<br>0.010<br>0.005<br>0.000   |
| Variable Density      |   |   |  0.030<br>0.025<br>0.020<br>0.015<br>0.010<br>0.005<br>0.000  |
| Greedy Mask Selection |  |  |  0.030<br>0.025<br>0.020<br>0.015<br>0.010<br>0.005<br>0.000 |
| LOUPE                 |  |  |  0.030<br>0.025<br>0.020<br>0.015<br>0.010<br>0.005<br>0.000 |
| DPS                   |  |  |  0.030<br>0.025<br>0.020<br>0.015<br>0.010<br>0.005<br>0.000 |
| A-DPS                 |  |  |  0.030<br>0.025<br>0.020<br>0.015<br>0.010<br>0.005<br>0.000 |
